# Supplementary material for: β-Lactam Resistance in ESKAPE Pathogens Mediated Through Modifications in Penicillin-Binding Proteins: An Overview
Source: PubMed Central journal article supplement — Infect Dis Ther. 2023 Mar 6;12(3):829–41. doi: 10.1007/s40121-023-00771-8 (PMC10017896; doi:10.1007/s40121-023-00771-8), 2023-03-06
Supplement: 40121_2023_771_MOESM1_ESM.pdf [file 40121_2023_771_MOESM1_ESM.pdf]

## **$\beta$ -lactam resistance in ESKAPE pathogens mediated through modifications in Penicillin-**

### **Binding Proteins: An overview**

Dhiviya Prabaa Muthuirulandi Sethuvel<sup>1</sup>, Yamuna Devi Bakthavachalam<sup>1</sup>, Maruthan Karthik<sup>1</sup>,  
Irulappan Madhumathi<sup>1</sup>, Rahul Shrivastava<sup>2</sup>, Hariharan Periasamy<sup>2</sup>, \*Balaji Veeraraghavan<sup>1</sup>

<sup>1</sup>Department of Clinical Microbiology, Christian Medical College, Vellore-632004

<sup>2</sup>Wockhardt Research Centre, Aurangabad, India.

### **\*Corresponding Author**

Balaji Veeraraghavan

Professor

Department of Clinical Microbiology

Christian Medical College, Vellore-632004

Email: [vbajali@cmevellore.ac.in](mailto:vbajali@cmevellore.ac.in)

Table: S1 – DBO molecule recently identified to inhibit  $\beta$ -lactamases and bind PBPs of ESKAPE pathogens

| DBO molecules that can inhibit $\beta$ -lactamases and bind PBPs | Effective against                                                     | References                                                                                                                                                                                                                                                                                                                                                                                                                                                                                                        |
|------------------------------------------------------------------|-----------------------------------------------------------------------|-------------------------------------------------------------------------------------------------------------------------------------------------------------------------------------------------------------------------------------------------------------------------------------------------------------------------------------------------------------------------------------------------------------------------------------------------------------------------------------------------------------------|
| Avibactam                                                        | <i>Klebsiella pneumoniae</i>                                          | Sutaria DS, Moya B, Green KB, Kim TH, Tao X, Jiao Y, Louie A, Drusano GL, Bulitta JB. First penicillin-binding protein occupancy patterns of $\beta$ -lactams and $\beta$ -lactamase inhibitors in <i>Klebsiella pneumoniae</i> . <i>Antimicrobial agents and chemotherapy</i> . 2018 May 25;62(6):e00282-18.                                                                                                                                                                                                     |
| Relebactam                                                       | Enterobacteriaceae; low activity against <i>Klebsiella pneumoniae</i> | Bush, K., Bradford, P.A., 2016. $\beta$ -lactams and $\beta$ -lactamase inhibitors: an overview. <i>Cold Spring Harb. Perspect. Med.</i> 6, a025247. <a href="http://dx.doi.org/10.1101/cshperspect.a025247">http://dx.doi.org/10.1101/cshperspect.a025247</a> .                                                                                                                                                                                                                                                  |
| Nacubactam                                                       | Enterobacteriaceae and non-ESBL-producing <i>K. pneumoniae</i>        | Morinaka, A., Tsutsumi, Y., Yamada, M., Suzuki, K., Watanabe, T., Abe, T., Furuuchi, T., Inamura, S., Sakamaki, Y., Mitsuhashi, N., Ida, T., Livermore, D.M., 2015. OP0595, a new diazabicyclooctane: mode of action as a serine $\beta$ -lactamase inhibitor, antibiotic and $\beta$ -lactam “enhancer”. <i>J. Antimicrob. Chemother.</i> 70, 2779–2786. <a href="http://dx.doi.org/10.1093/jac/dkv166">http://dx.doi.org/10.1093/jac/dkv166</a>                                                                 |
| Zidebactam                                                       | <i>Pseudomonas aeruginosa</i>                                         | Moya, B., Barcelo, I.M., Bhagwat, S., Patel, M., Bou, G., Papp-Wallace, K.M., Bonomo, R.A., Oliver, A., 2017. WCK 5107 (zidebactam) and WCK 5153 are novel inhibitors of PBP2 showing potent “ $\beta$ -lactam enhancer” activity against <i>Pseudomonas aeruginosa</i> , including multidrug-resistant metallo- $\beta$ -lactamase-producing high-risk clones. <i>Antimicrob. Agents Chemother.</i> 61, 16–e02529. <a href="http://dx.doi.org/10.1128/AAC.02529-16">http://dx.doi.org/10.1128/AAC.02529-16</a> . |
| ETX2514                                                          | <i>Escherichia coli</i> and <i>Klebsiella pneumoniae</i> and          | Durand-Réville, T.F., Guler, S., Comita-Prevoir, J., Chen, B., Bifulco, N., Huynh, H., Lahiri, S., Shapiro, A.B., McLeod, S.M., Carter,                                                                                                                                                                                                                                                                                                                                                                           |

|  |                                |                                                                                                                                                                                                                                                                                                                                                                                                                                                                                                                                                    |
|--|--------------------------------|----------------------------------------------------------------------------------------------------------------------------------------------------------------------------------------------------------------------------------------------------------------------------------------------------------------------------------------------------------------------------------------------------------------------------------------------------------------------------------------------------------------------------------------------------|
|  | <i>Acinetobacter baumannii</i> | N.M., Moussa, S.H., Velez-Vega, C., Olivier, N.B., McLaughlin, R., Gao, N., Thresher, J., Palmer, T., Andrews, B., Giacobbe, R.A., Newman, J.V., Ehmann, D.E., de Jonge, B., O'Donnell, J., Mueller, J.P., Tommasi, R.A., Miller, A.A., 2017. ETX2514 is a broad-spectrum $\beta$ -lactamase inhibitor for the treatment of drug-resistant Gram-negative bacteria including <i>Acinetobacter baumannii</i> . Nat. Microbiol. 2, 17104. <a href="http://dx.doi.org/10.1038/nmicrobiol.2017.104">http://dx.doi.org/10.1038/nmicrobiol.2017.104</a> . |
|--|--------------------------------|----------------------------------------------------------------------------------------------------------------------------------------------------------------------------------------------------------------------------------------------------------------------------------------------------------------------------------------------------------------------------------------------------------------------------------------------------------------------------------------------------------------------------------------------------|
